# Supplementary material for: A model for aging under deformation field, residual stresses and strains in soft glassy materials
Source: Royal Society of Chemistry journal article supplement (doi:10.1039/c5sm00217f), 2015-01-01
Supplement: c5sm00217f1.pdf [file c5sm00217f1.pdf]

## Supplementary information:

### A Model for Aging under Deformation Field, Residual Stresses and Strains in Soft Glassy Materials

Yogesh M Joshi

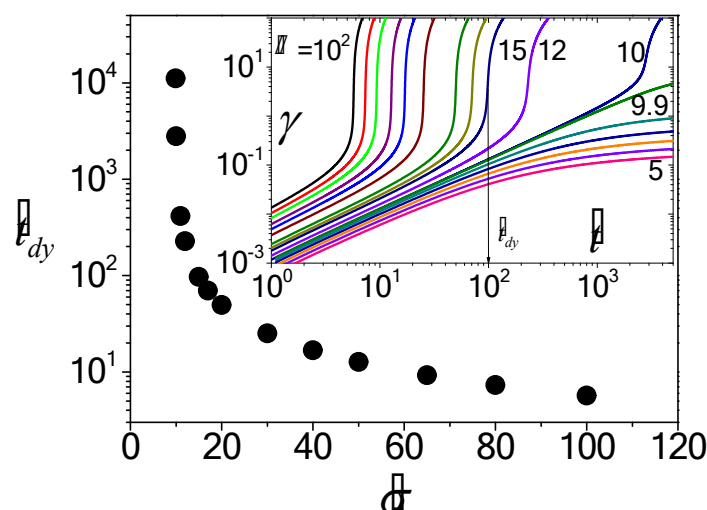

**Figure S1.** Time to yield  $t_{dy}^c$  is plotted against creep stress for  $\mu=1.2$ ,  $A=10$  (the corresponding  $\phi_c=0.74$ ,  $\sigma_c=9.7$  and  $\phi^*=0.6$ ),  $\phi_i=0.7$  (the corresponding  $\sigma_{yi}=9.93$ ). It can be seen that as stress decreases towards yield stress,  $t_{dy}^c$  increases very sharply. The inset shows evolution of strain as a function of time for the values of stress from left to right  $\sigma_c=100, 80, 65, 50, 40, 30, 20, 17, 15, 12, 10, 9.9, 9, 8, 7, 6$ , and  $5$ . The inset clearly shows viscosity bifurcation for stress below and above  $\sigma_{yi}=9.93$ .

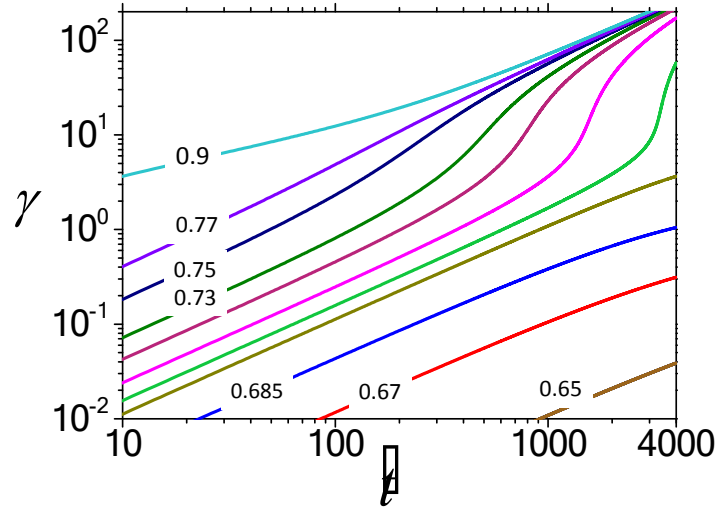

**Figure S2.** Evolution of of strain as a function of time is plotted various values of  $\phi_i$  for  $\mu=1.2$ ,  $A=10$  and  $\mathcal{R}=9.93$  (corresponding  $\phi_{ss}=0.7$ ). From bottom to top:  $\phi_i=0.65$ ,  $0.67$ ,  $0.685$ ,  $0.698$ ,  $0.703$ ,  $0.71$ ,  $0.72$ ,  $0.73$ ,  $0.75$ ,  $0.77$ , and  $0.9$  (the corresponding  $\phi_c=0.74$ ,  $\mathcal{R}_c=9.7$  and  $\phi^*=0.6$ ). It can be seen that for  $\phi_i > 0.7$  significant strain gets induced in the material, while for  $\phi_i < 0.7$ , strain approaches a plateau value.
